# Supplementary material for: α-Terpineol loaded, electron beam crosslinked polyvinyl alcohol/tapioca starch hydrogel sheets; fabrication, characterization and evaluation of wound healing potential on a full thickness acid burn wound
Source: Royal Society of Chemistry journal article supplement (doi:10.1039/d4ra04572f), 2024-01-01
Supplement: d4ra04572f1.pdf [file d4ra04572f1.pdf]

**Supplementary file**

**$\alpha$ -Terpineol loaded, electron beam crosslinked Polyvinyl alcohol/tapioca starch hydrogel sheets; fabrication, characterization and evaluation of wound healing potential on a full thickness acid burn wound**

*Maria Khalid\*<sup>1</sup>, Fatima Jameel\*<sup>2</sup>, Tooba Jabri<sup>1</sup>, Abdul Jabbar<sup>1</sup>, Asmat Salim<sup>2</sup>, Irfan Khan<sup>2, 3</sup>, Muhammad Raza Shah<sup>1</sup>*

*<sup>1</sup>HEJ Research Institute of Chemistry, International Center for Chemical and Biological Sciences, University of Karachi, Karachi, 75270, Pakistan.*

*<sup>2</sup>Dr. Panjwani Center for Molecular Medicine and Drug Research, International Center for Chemical and Biological Sciences, University of Karachi, Karachi, 75270, Pakistan.*

*<sup>3</sup>Center for Regenerative Medicine and Stem Cell Research, The Aga Khan University, Stadium Road, P. O Box 3500, Karachi 74800, Pakistan*

## **Table of contents**

Table S1: Swelling ratio of PVA tapioca sheet hydrogel as a function of time

Table S2: Moisture retention of PVA tapioca sheet hydrogel as a function of time

Fig S1: Gene expression profile of inflammatory genes

**Table S1: Swelling ratio of PVA Tapioca sheet hydrogel as a function of time**

| Hours | Weight 1 (g) | Swelling 1 % | Weight 2 (g) | Swelling 2 % | Weight 3 (g) | Swelling 3 % | Mean swelling $\pm$ SD (%) |
|-------|--------------|--------------|--------------|--------------|--------------|--------------|----------------------------|
| 0.5   | 0.3641       | 65.5         | 0.4301       | 95.5         | 0.3945       | 79.3         | 80.1 $\pm$ 15.8            |
| 1     | 0.4609       | 109.5        | 0.5532       | 121.3        | 0.5102       | 131.9        | 120.9 $\pm$ 11.3           |
| 2     | 0.5566       | 153          | 0.6737       | 169.5        | 0.6358       | 189          | 170.5 $\pm$ 18.6           |
| 3     | 0.7007       | 218.5        | 0.8267       | 230.7        | 0.7566       | 243.9        | 230.7 $\pm$ 13.4           |
| 4     | 0.8741       | 297.3        | 1.0502       | 320.1        | 0.9761       | 343.7        | 320.3 $\pm$ 22.6           |
| 5     | 1.0877       | 394.4        | 1.2772       | 410.9        | 1.1605       | 427.5        | 410.9 $\pm$ 16.5           |
| 6     | 1.2423       | 464.7        | 1.4417       | 476.7        | 1.2954       | 488.7        | 476.7 $\pm$ 12             |
| 9     | 1.4918       | 578.1        | 1.745        | 598          | 1.5796       | 618.5        | 598.3 $\pm$ 20.1           |
| 12    | 1.6172       | 635.1        | 1.9183       | 667.3        | 1.7520       | 696.4        | 666.3 $\pm$ 26.2           |
| 24    | 1.9274       | 776.1        | 2.2487       | 799.5        | 2.0108       | 814.0        | 796.87 $\pm$ 15.2          |
| 48    | 1.9967       | 807.6        | 2.3255       | 830.2        | 2.0899       | 849.5        | 829.1 $\pm$ 20.8           |

**Table S2: Moisture retention of PVA Tapioca sheet hydrogel as a function of time**Disc 1  $W_w=2.3$  gDisc 2  $W_w=2.4$  gDisc 3  $W_w=2.2$  g

| hours      | Disc 1 (g / %) | Disc 2 (g / %) | Disc 3 (g / %) | Mean moisture retention $\pm$ SD (%) |
|------------|----------------|----------------|----------------|--------------------------------------|
| <b>0.5</b> | 2.1916/ 93.4   | 2.3215/ 95.8   | 2.0825/ 94.6   | 94.6 $\pm$ 1.2                       |
| <b>1</b>   | 2.0746 / 90.2  | 2.2176/ 92.4   | 2.0086/ 91.3   | 91.3 $\pm$ 1.1                       |
| <b>2</b>   | 2.0102/ 87.4   | 2.172/ 90.5    | 1.8546 / 84.3  | 87.4 $\pm$ 3.1                       |
| <b>3</b>   | 1.9159/ 83.3   | 2.0472/ 85.3   | 1.7886/ 81.3   | 83.3 $\pm$ 2.5                       |
| <b>4</b>   | 1.8400/ 80.0   | 1.9584/ 81.6   | 1.7248/ 78.4   | 80.0 $\pm$ 1.6                       |
| <b>5</b>   | 1.7779/ 77.4   | 1.8936/ 78.9   | 1.6654/ 75.6   | 77.3 $\pm$ 1.6                       |
| <b>6</b>   | 1,6560/ 72.0   | 1.8024/ 75.1   | 1.6170/ 73.5   | 73.5 $\pm$ 1.5                       |

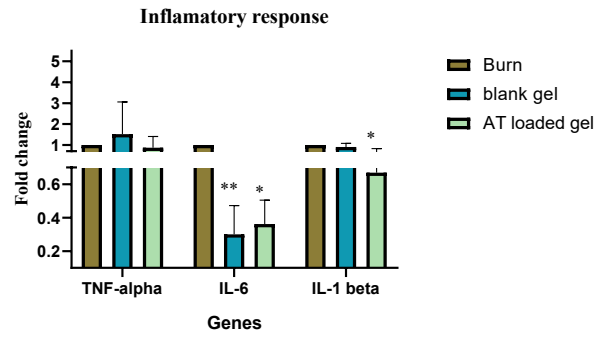

**Fig. S1. Gene expression profile of inflammatory genes analysis:** Bar graphs representing quantitative gene expression of TNF-alpha, IL-6, and IL-1 beta in all experimental groups. . IBM SPSS 21 software was used for One-way ANOVA and Bonferroni post-hoc test;  $p$ -value  $\leq 0.05$  was considered statistically significant; (\*\*\*) =  $p \leq 0.001$ , \*\* =  $p \leq 0.01$  and \* =  $p \leq 0.05$ ).
